1 **Neural computation through sensorimotor dynamics for**  
2 **predictive sensorimotor control**

3

4 Running Title: Sensory-motor interplay in motor cortex

5

6 Yiheng Zhang<sup>1,3,4</sup>, Yun Chen<sup>1,3,4</sup>, Tianwei Wang<sup>1,3</sup>, and He Cui<sup>1,2,3\*</sup>

7

8 <sup>1</sup> Center for Excellence in Brain Science and Intelligence Technology, Institute  
9 of Neuroscience, Chinese Academy of Sciences, Shanghai 200031, China

10 <sup>2</sup> Shanghai Center for Brain and Brain-inspired Intelligence Technology,  
11 Shanghai, 200031, China

12 <sup>3</sup> University of Chinese Academy of Sciences, Beijing 100049, China

13 <sup>4</sup> equal contribution

14

15 \*Correspondence: cuihe@ion.ac.cn

16

17

18

## 19 **Highlights**

20

21 M1 neuronal activity is jointly tuned by reach direction and target motion  
22 during flexible manual interception.

23

24 Neural states of single trials form an orbital neural geometry at movement  
25 onset.

26

27 Neural geometry emerges in a recurrent neural network for predictive  
28 spatiotemporal transformation.

29

30 Movement-related neural structures tilted by target motion result from mixed  
31 sensorimotor selectivity at the single-neuron level.

32

## 33 **Summary**

34 Although recent studies have shown that activity of the motor cortex conveys  
35 substantial information regarding sensory inputs in addition to motor outputs, it is  
36 unclear how sensory inflows and motor outflows interplay to issue motor  
37 commands. Here, we recorded population neural activity in the motor cortex via  
38 microelectrode arrays while monkeys performed flexible manual interception of  
39 moving targets, in a task that required predictive sensorimotor control. For such a  
40 dynamic sensory-motor task, the activity of most neurons in the motor cortex not  
41 only encoded upcoming movements, but was also modulated by ongoing target  
42 motion. Dimensionality reduction at movement onset demonstrated a latent  
43 orbital neural geometry with neural states clustered by reach directions, and tilted  
44 in ellipses corresponding to target speed. Such neural geometry also emerged in  
45 a recurrent neural network (RNN) with task-specific input-output mapping. We  
46 propose that neural computation through sensorimotor dynamics is based on  
47 neuronal mixed selectivity, and acts like a state evolution.

48

## 49 **Keywords**

50 Reach, Population Decoding, Dimensionality Reduction, Recurrent Neural  
51 Network, Motor Cortex

52

53

## 54 **Introduction**

55 Motor cortex, a central brain region generating motor commands, has been  
56 recently found to carry substantial sensory information (Hatsopoulos and  
57 Suminski, 2011; Sobinov and Bensmaia, 2021) in addition to movement  
58 kinetics (Evarts, 1968; Tanaka, 2016) and kinematics (Georgopoulos et al.,  
59 1982; Omrani et al., 2017; Wang et al., 2022). Activity in the motor cortex is  
60 strongly influenced by reference frame (Pesaran et al., 2006), hand trajectory  
61 (Paninski et al., 2004), and stimuli for target selection (Cisek and Kalaska,  
62 2005); some neurons even respond to sensory stimuli alone during visual  
63 replay (Tkach et al., 2007). However, it is unclear how sensory inflows and  
64 motor outflows interact to form motor plans in the motor cortex.

65 With recent advances in large-scale neural recording and population  
66 analysis, a dynamical systems perspective has emerged in motor control that  
67 posits the motor cortex as an autonomous dynamical machine (Churchland et  
68 al., 2012; Shenoy et al., 2013; Vyas et al., 2020). From this point of view,  
69 preparatory population activity is promoted toward a movement-specific  
70 optimal subspace to set initial states seeding the motor generation  
71 (Churchland et al., 2010; Churchland et al., 2006). However, it remains to be  
72 determined if behaviorally relevant sensory variables are also embodied in the  
73 movement-related neural subspace, or in a separate/orthogonal one  
74 (Kaufman et al., 2014; Stavisky et al., 2017).

75 To reveal neural dynamics related to sensorimotor interplay, we recorded  
76 population activity in the primary motor cortex (M1) from monkeys performing  
77 a flexible manual interception task (Li et al., 2018; 2022). Unlike previous  
78 studies requiring interception at a fixed location (Merchant et al., 2004a; b),  
79 this flexible interception depends on predictive spatiotemporal mappings to  
80 displace a body effector to the right place at the right time. We found that the  
81 activity of most neurons was jointly tuned to both reach direction and target  
82 speed  $f$  as gain modulation, directional selectivity shifting, baseline  
83 adjustment, or their combinations. Strikingly, such mixed sensorimotor  
84 selectivity was exhibited throughout the entire trial, in contrast to the gradient  
85 of sensory-to-motor tuning from cue to movement epochs that we recently  
86 reported in posterior parietal cortex (PPC) (Li et al., 2022). Principal

87 component analysis (PCA) of the neural population revealed a clear orbital  
88 neural geometry in low-dimensional space at movement onset. Interestingly,  
89 the neural states were clustered by reach directions, and formed ringlike  
90 structures whose slopes were determined by target speed. A recurrent neural  
91 network (RNN) trained with proper input-output mappings demanded by the  
92 task could mimic such neural geometry. Further simulation indicated that  
93 these characteristics of neural population dynamics could be derived from the  
94 mixed sensorimotor selectivity of single neurons. We propose that neural  
95 computations through dynamics in latent space might provide deep insights  
96 into the sensorimotor interplay for predictive sensorimotor control.

## 97 **Results**

### 98 **Behavioral task and performance**

99 Three macaque monkeys (*Macaca mulata*, C, G, and D, male 7-10 kg) were  
100 trained to perform a delayed manual interception task (Figure 1A) modified  
101 from the task employed by (Li et al., 2018). The monkey held a dot in the  
102 center for 600 ms to initiate a trial, and then a static or circularly moving target  
103 appeared at a random location on a circular track centered on that dot. The  
104 monkey was required to wait for a random delay (400-800 ms) until the central  
105 dot went dark (GO signal), and then to immediately reach for the target. The  
106 target moved at one of five angular speeds either counterclockwise (CCW) or  
107 clockwise (CW) as -240 °/s, -120 °/s, 0 (static control), 120 °/s, and 240 °/s,  
108 interleaved trial by trial; it stopped once the monkey touched any peripheral  
109 location.

110 For well-trained monkeys, the reach was launched directly toward the target  
111 location at interception, with little in-flight adjustment (Figure 1B; (Li et al.,  
112 2018)). Behavioral performance across the five target-speed conditions was  
113 similar, with overlapped endpoint distribution (Figure 1B dot ellipses) and  
114 hand velocity profiles (Figure 1C, correlation coefficient  $0.96 \pm 0.05$ , mean  $\pm$   
115 SD). In this flexible interception task, the predictive motor plans guaranteed by  
116 the interleaved design along with the consistent performance across different  
117 conditions, enabled an efficient dissociation between sensory modulation and  
118 motor planning.

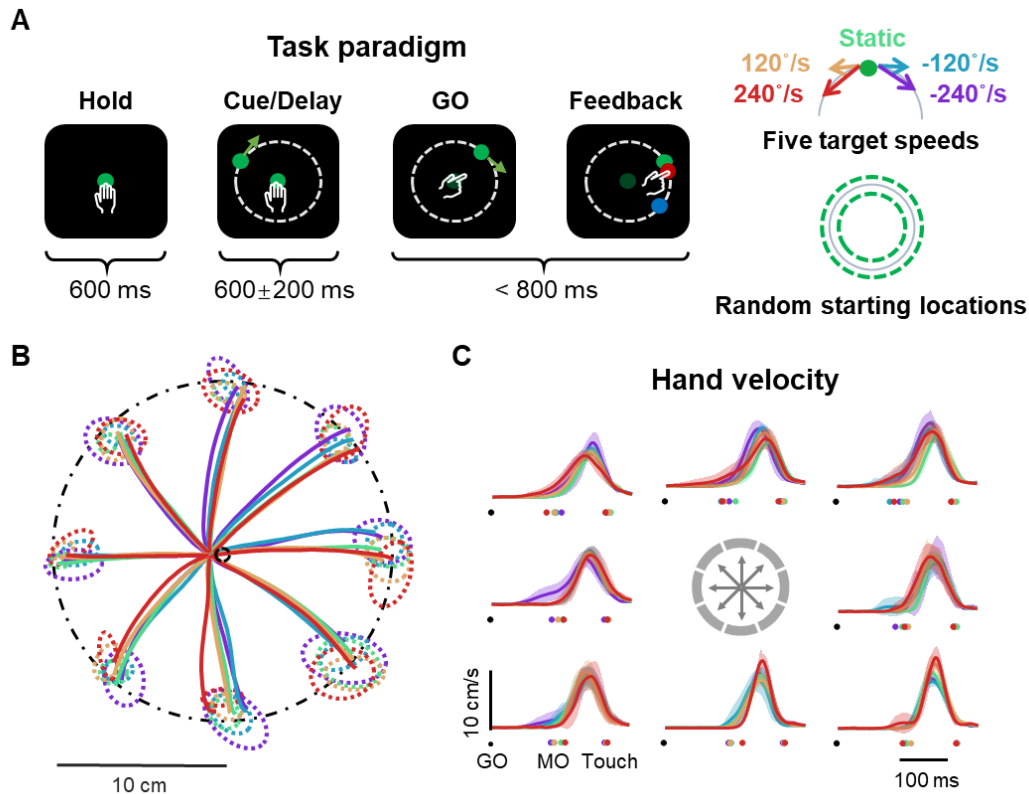

119

120 **Figure 1. Flexible manual interception task and behavioral performance**

121 (A) Diagram of interception task. The five target-speed conditions (-240 °/s, -120 °/s,  
122 static, 120 °/s, and 240 °/s) are indicated in five colors (red, yellow, green, blue, and  
123 purple). Target starting location was randomly distributed.

124 (B) The condition-averaged hand trajectory. The mean trajectories from MO to touch in  
125 five target-speed conditions (monkey C, 772 correct trials in one session) were plotted as  
126 solid lines in the same color as (A). Reach direction was divided into eight zones each  
127 covering 45 degrees, and represented by the corresponding eight directions. The  
128 distribution of reach endpoints relative to target endpoints is shown by the dot ellipses.  
129 The shifted center-holding was likely due to individual preference.

130 (C) The condition-averaged hand velocity. Hand velocity in the same session was  
131 averaged by both target speed and reach direction as in (B). The lines are in the same  
132 color as in (A) and the position of subplots corresponds to the reach direction denoted by  
133 gray inset. All profiles are aligned to GO (black dots) with marked movement onset (MO)  
134 and touch (interception) time (dots in colors).

135

## 136 **Mixed sensorimotor selectivity of single neurons**

137 Our first question is whether the directional selectivity of neurons in the motor  
138 cortex would be modulated by target speed. We recorded 95, 107, and 55 single  
139 neurons with Utah arrays from monkey C, G, and D, respectively (implanted sites  
140 were shown in [Figure 2A](#)). Notably, we found that neuronal directional tuning was  
141 affected by target motion mainly in three ways: preferred direction (PD) shift, gain  
142 modulation, and baseline adjustment ([Figures 2B](#) and [S1-S3, Methods](#)). Some  
143 neurons showed shifted PDs during interception of moving targets relative to the  
144 PDs of static targets ([Figure 2B](#), *PD shift*). In this case, the motion direction rather  
145 than the speed of the target dominated the PD shift, as illustrated by an example  
146 neuron: its PDs corresponding to CCW conditions (red and yellow) were clearly  
147 distinguished from those of CW conditions (blue and purple), while its tuning  
148 curves for conditions with the same direction, namely 240 °/s (red) and 120 °/s  
149 (yellow) as well as -240 °/s (purple) and -120 °/s (blue), were very similar. Some  
150 neurons exhibited reach-direction tuning with gain modulation by target speed  
151 ([Figure 2B](#), *gain*). Here the PDs remained invariant; instead, the neuronal  
152 responses at PD differed across conditions. This modulation was dominated by  
153 the direction of target motion as well. The turning curves of the example neuron,  
154 which displayed higher responses at PD in CW conditions (blue and purple) than  
155 in others (green, yellow, and red), implied a varying strength of selectivity for  
156 reach direction. In addition, the baseline activity of some neurons changed with  
157 target speeds ([Figure 2B](#), *baseline*). As the adjustment was distributed uniformly  
158 in almost all reach directions, the target speed seemed like a scaling factor of  
159 neuronal activity.

160 It was difficult to classify these neurons with mixed sensorimotor selectivity into  
161 the three groups (PD shift, gain, and baseline) exclusively, because many of  
162 them exhibited mixed two or three of above modulations ([Figure 2C](#)). Moreover,  
163 there was no bias or clustering for neurons with certain combinations of  
164 modulations, making it hard to give an analytical description of single neurons.  
165 These results demonstrate heterogeneous patterns of sensorimotor interplay in  
166 M1 neurons, suggesting that the motor cortex is involved in complex  
167 sensorimotor computation.

168

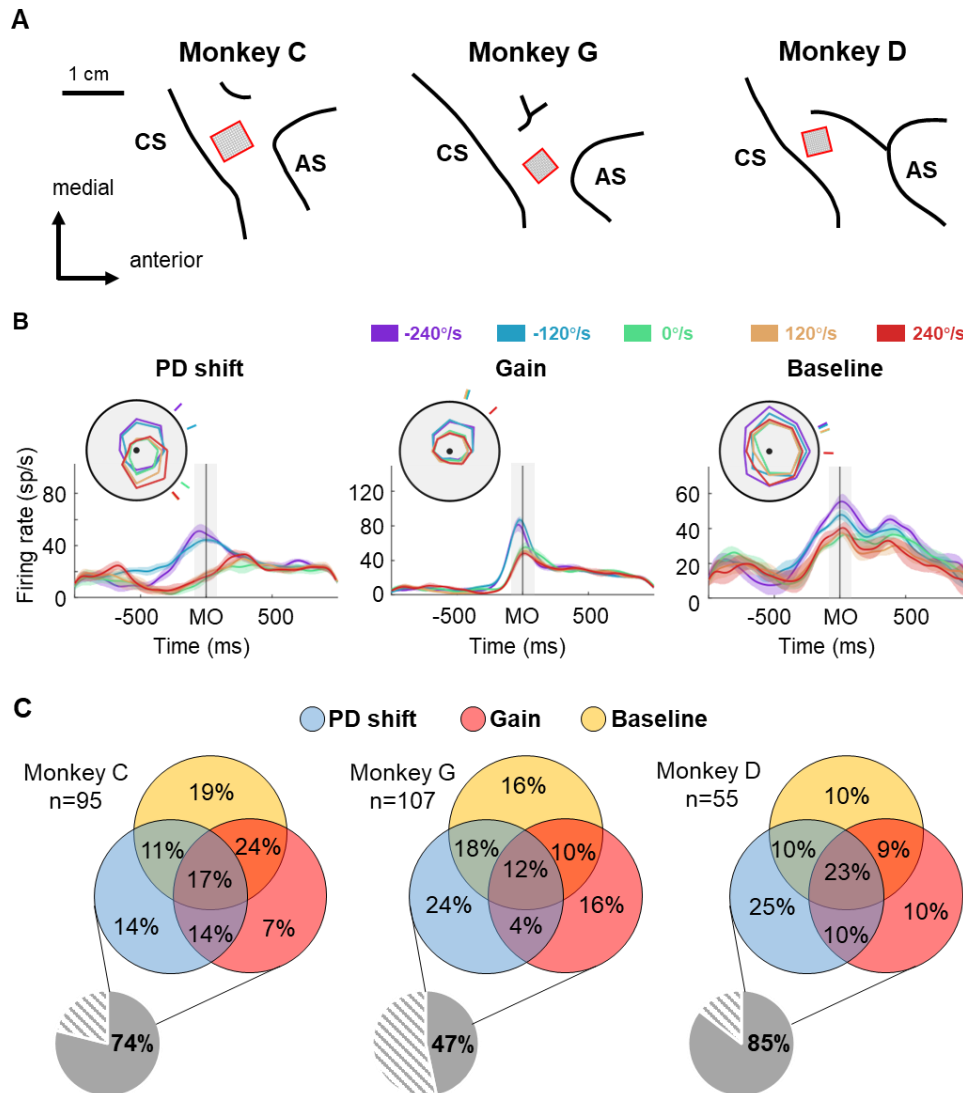

169

170 **Figure 2. Mixed sensorimotor selectivity of single neurons**

171 (A) Utah array locations in the motor cortex of the three monkeys. Neural data were  
 172 collected with monkey using the hand contralateral to the recorded cortical regions. AS,  
 173 arcuate sulcus; CS, central sulcus.

174 (B) Three example neurons with PD shift, gain modulation, and baseline adjustment,  
 175 respectively. The peristimulus time histograms (PSTH) shows the activity of example  
 176 neurons when monkeys reached to upper areas in five target-speed conditions. The inset  
 177 as radar plot shows the reach tuning curves in polar coordinate system around the  
 178 movement onset ( $\pm 100$  ms), with surrounding short bars pointing to the preferred  
 179 directions. The shadow area of PSTH lines denotes the standard error.

180 (C) The proportions of three types of modulation around MO of three monkeys. The small pie  
 181 charts show the proportions of neurons with (gray) or without (shadow) sensory modulation.  
 182 The large pie charts show the proportions of neurons with mixed sensorimotor selectivity  
 183 specifically in PD shift (blue), gain modulation (red), baseline adjustment (yellow), or their  
 184 mixture (overlapped).



## 185 **Population decoding sensory and motor information**

186 To learn more about sensorimotor computation during interception, we  
187 investigated the relevant information embodied in population activity. First, we  
188 performed a decoding analysis. Neural data from a selected session was  
189 utilized to train two support vector machine (SVM) classifiers for target speed  
190 (one in five) and reach direction (one in eight), respectively (Methods). As  
191 Figure 3A shows, the decoding accuracy of target speed rose quickly and  
192 peaked at over 70% around GO, while the decoding accuracy of reach  
193 direction climbed and reached a plateau of over 80% before movement onset  
194 (MO). Supported by this decoding result, the simultaneous encoding of target  
195 speed and reach direction from preparatory to execution period was also  
196 reflected at population level.

197 We wondered whether the encoding pattern varied with conditions, so we  
198 conducted a more detailed decoding analysis. In the resulting confusion  
199 matrices (Figure 3B), each patch denotes the decoding accuracy of a decoder  
200 trained by the row data and tested with the column data. It turned out that the  
201 reach-direction decoder could be generalized between static and interception  
202 conditions at GO and MO. This generalization, however, held for conditions  
203 with the same target motion direction (e.g., the -120 °/s trained classifier also  
204 worked for the -240 °/s condition), but not for conditions with opposite target  
205 motion directions (e.g., the -120 trained classifier was hard to decode 120 °/s  
206 or 240 °/s conditions). On the other hand, the target-speed decoder only  
207 showed temporal generalization between TO-GO and GO-MO, and was  
208 poorly generalized for the other reach directions. This result suggests that the  
209 population activity may reflect different coding strategies for reach direction  
210 and target speed.

211 Therefore, to explore these rules and determine how sensory inflow and  
212 motor outflow might interact at population level, we performed PCA on the  
213 normalized population activity. Figure 3C shows the neural states of single  
214 trials in different time windows. As MO approached, neural states gradually  
215 clustered by reach direction. The first two principal components (PCs) of the  
216 neural states at MO explained the most variance ([24.8%, 13.8%]) and were  
217 most related with reach direction (the mean fitting goodness of reach

218 direction,  $[R_{pc1}^2, R_{pc2}^2] = [0.93, 0.86]$ ). Furthermore, the neural states tended

219 to form five ringlike structures corresponding to five target speeds at MO (the  
 220 mean goodness of fitting ellipses,  $R^2 = 0.67 \pm 0.06$ ,  $0.81 \pm 0.04$ ,  $0.93 \pm 0.01$ , and  
 221  $0.77 \pm 0.05$ , for the four time windows, mean  $\pm$  sd., Figure 3C). This inspired us  
 222 to consider the possibility that the motor cortex encodes both reach direction  
 223 and target speed information in a subtly structured manner at MO.

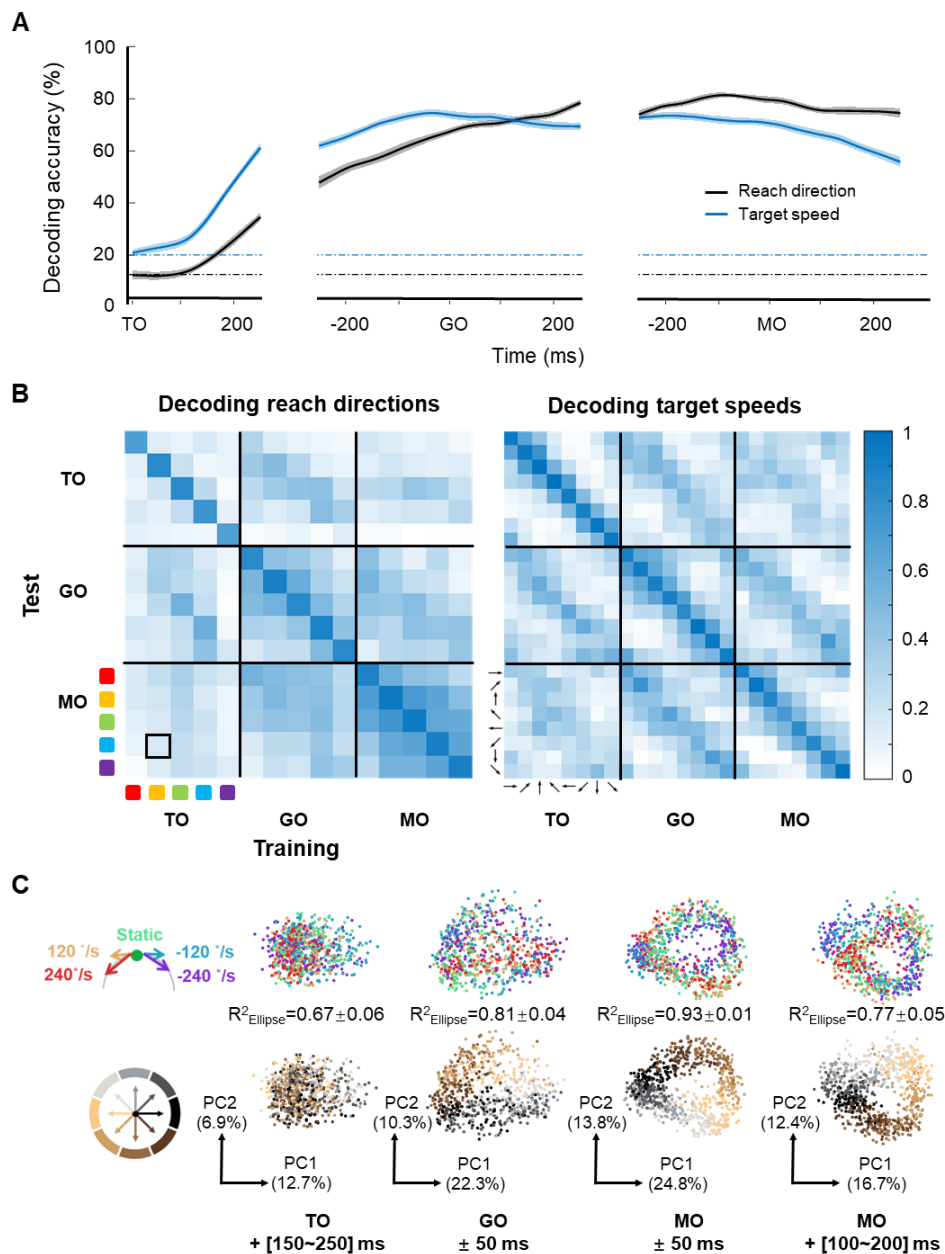

224

225 **Figure 3. Features of encoding pattern at population level**

226 (A) The mean decoding accuracy (SVM with 10-fold cross-validation) of reach direction  
 227 (black solid line) and target speed (blue solid line) for population activity (monkey C,  
 228 n=95, 100-ms sliding window), aligned to target on (TO), GO, and MO, respectively. The

229 dash-dotted lines are chance levels for reach direction (black, one in eight) and target  
230 speed (blue, one in five). The shaded area is the standard deviation.  
231 (B) The decoding accuracy for reach direction and target speed in different conditions  
232 (the same dataset in [Figure 3A](#)). The left panel shows the decoding accuracy for reach  
233 direction among five target-speed conditions in three epochs: TO [200~400] ms, GO  $\pm$   
234 100 ms, and MO  $\pm$  100 ms (SVM with 10-fold cross-validation, and the chance level is  
235 one in eight). The five target-speed conditions are labeled in five colored squares. The  
236 abscissa is the training data in one target-speed condition during one epoch, and the  
237 ordinate is the test data arranged in a consistent order. For example, the framed patch  
238 corresponds to a classifier trained by data in 120 °/s during TO and tested by -120 °/s  
239 during MO. The decoding accuracy is shown by the color depth. The right panel shows  
240 the decoding accuracy for target speed in distinct reach directions and time windows  
241 (SVM with 10-fold cross-validation, the chance level is one in five) with arrows with  
242 different direction indicating the reach direction.  
243 (C) The neural states in different time windows. In the space spanned by the first two  
244 principal components (PCs), each point represents the neural state of a single trial and is  
245 colored in target speed (first row) or reach direction (second row). The corresponding  
246 explained variance of PCs and the  $R^2$  of fitting ellipses is marked for different time  
247 windows.  
248

## 249 **The orbital neural geometry in latent dynamics**

250 For a closer inspection, we focused on the newfound neural geometry in low-  
251 dimensional space at MO to examine the latent sensorimotor interaction.  
252 Then, we projected all neural states into the three-dimensional subspace  
253 resulted from static condition (Figures 4A and S4). Similar to the above two-  
254 dimensional results, the single-trial neural states clustered according to reach  
255 direction, and the projections of these clusters onto the PC1-PC2 subspace  
256 formed a ring in order (Figures 4A top and 4B right). Interestingly, the five  
257 ringlike structures of different target motion conditions, the ‘target-speed  
258 ellipses’ ( $R^2 = 0.92 \pm 0.01$ , ellipse eccentricity =  $0.59 \pm 0.11$ , see Methods),  
259 exhibited organized nesting. They sloped with condition-dependent angles,  
260 which is particularly evident in the PC2-PC3 subspace (Figure 4A bottom and  
261 4B left). This spatial feature was further quantified by calculating the elevation  
262 and azimuth angles of their normal vectors, which revealed that the ellipses of  
263 target speeds in opposite directions inclined symmetrically relative to the  
264 static condition, like mirroring (Figure 4C). We also fitted the ‘PD’ of individual  
265 PCs with cosine functions to show the tuning properties of three dimensions  
266 (Figure 4D). While the PDs of the first two PCs were similar across five target  
267 motion conditions (dash and dotted lines), the PDs of PC3 were quite different  
268 (solid lines), hinting that sensory information may be mainly embodied in PC3.  
269 This distribution agrees with the possible geometric description with  
270 parametric equations (Figure S5).

271 Given these results, we propose that this orbital neural geometry, including  
272 both the target-speed ellipses and the reach-direction clusters, epitomizes the  
273 sensorimotor interaction in the motor cortex at population level. This geometry  
274 maintained the principal and relatively robust neural coding of motor output  
275 during interception, even with different target speeds, via the reach-direction  
276 clusters ordered in the first two PCs. This geometry is also reflected in the  
277 target-speed ellipses, in which the sensory input can modulate the motor  
278 information in an orthogonal dimension (PC3), altering neural states without  
279 interfering with the generation of motor command.

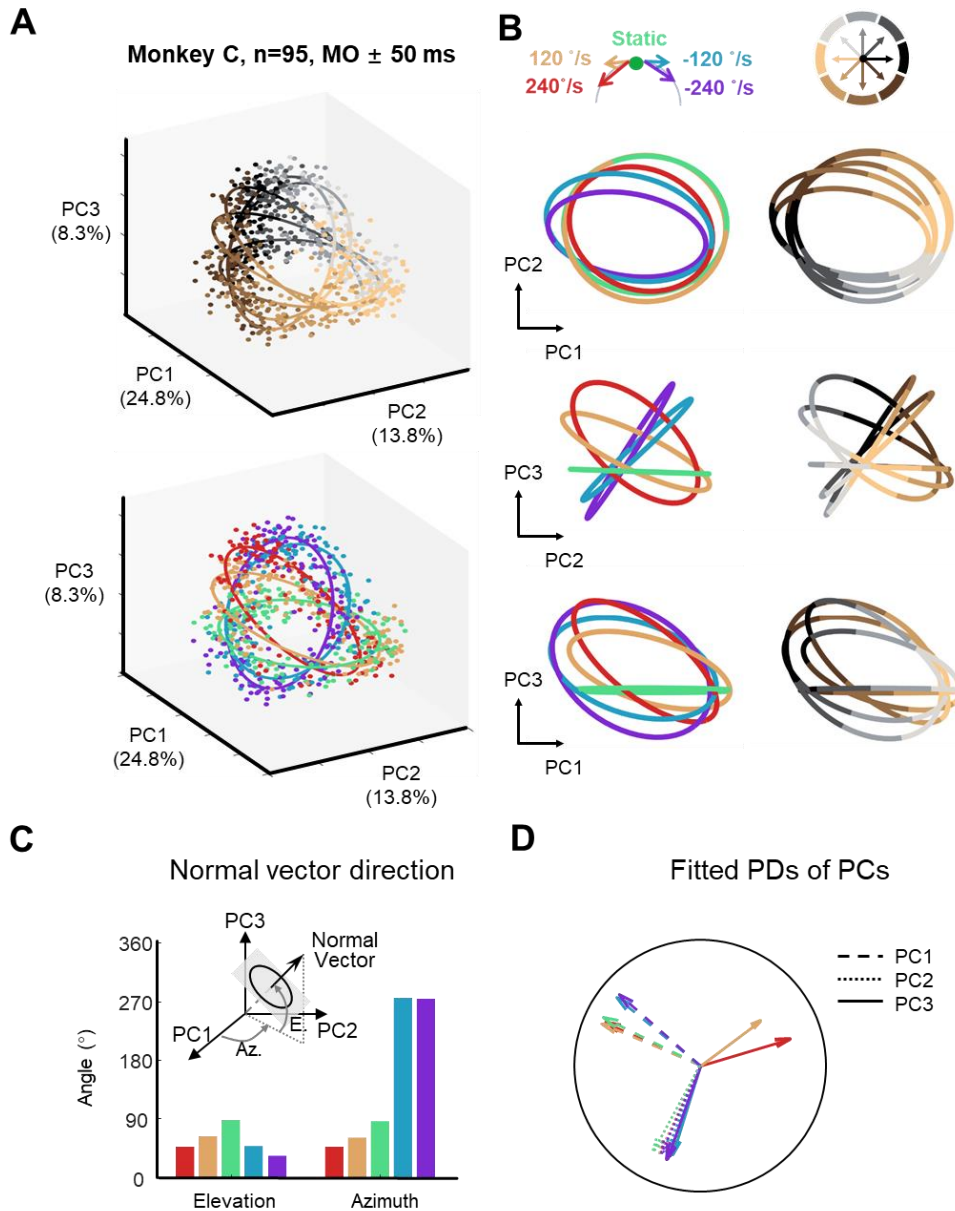

280

281 **Figure 4. The orbital neural geometry in latent dynamics**

282 (A) Three-dimensional neural state of M1 activity obtained from PCA. Similar to [Figure](#)  
283 [3C](#), each point represents a single trial. The upper subplot is colored corresponding to  
284 five target speeds, while the bottom one is in colors corresponding to eight reach  
285 directions. The explained variance of the first three PCs is 25.6%, 14.7%, and 8.7%,  
286 respectively.

287 (B) Fitted ellipses of neural states. The ellipses fitted in (A) are projected onto three two-  
288 dimensional spaces, colored in target speeds (left column) or reach directions (right  
289 column).

290 (C) Elevation and azimuth angle of normal vectors of the fitted ellipses in (A).

291 (D) Fitted PDs of the first three PCs in five target-speed conditions. The goodness of  
292 fitting is shown by the arrow length.

## 293 **Recurrent Neural Network for dynamic input-output mappings**

294 Even though the orbital neural geometry represents both sensory and motor  
295 information distinctly, it is notably a snapshot of dynamical evolution, rather  
296 than a constant representation (Figure 3C). We speculated that this neural  
297 geometry could be closely related to the initial states set in the optimal  
298 subspace. What kinds of external input may drive the neural dynamical  
299 system into such a state structure?

300 A series of RNNs receiving different combinations of inputs were built  
301 (Figure 5A; see Methods). The candidate inputs were simplified as target  
302 location, motor intention, and GO-signal to cover sensory, motor and timing  
303 information, respectively. In the brain, motor intention could be provided by  
304 the PPC (Andersen and Buneo, 2002; Andersen and Cui, 2009), and must be  
305 predictive to compensate for sensorimotor delays (Cui, 2016). We also  
306 compared the simulation effect of RNN with various forms of inputs. Although  
307 most variant networks could output accurate hand velocity, their state  
308 structure around MO appeared to diversely rely on input. For instance, in the  
309 absence of motor intention input, there were no reach-direction clusters in the  
310 state structure of the resulting network (Figure S7A); but one-dimensional  
311 stable or two-dimensional updating motor intention would cause the clusters  
312 to distort or disperse (Figures S7B and S7C). Moreover, if target location was  
313 offered as two-dimensional Cartesian coordinates, then the sensory  
314 modulation would not occur at the third PC, leading to a stack of target-speed-  
315 related state structures (Figure S7D). The network, whose state structure  
316 most resembled the orbital neural geometry, received target location in the  
317 real-time cosine of target direction, motor intention in stable two-dimensional  
318 Cartesian coordinates, and the GO signal in a step function (Figure 5B; see  
319 Methods). This is not by chance, but rather due to the angular distribution of  
320 target direction and the circular distribution of motor intention.

321 To verify that the orbital network geometry was indeed a computational  
322 structure rather than a training byproduct, we tested novel target speeds on  
323 the trained network. The result was that the network produced an  
324 extrapolating state geometry, where the new target-speed ellipses were  
325 interpolated between their 'elders' according to both direction and magnitude  
326 (Figure 5C). This generalization was also found in real neural states in several

327 additional sessions (Figure 5D). The reproduction of the orbital neural  
328 geometry by RNN suggests that this geometry can be derived from a specific  
329 input-output mapping, and incorporated into the dynamical systems  
330 perspective for motor control.

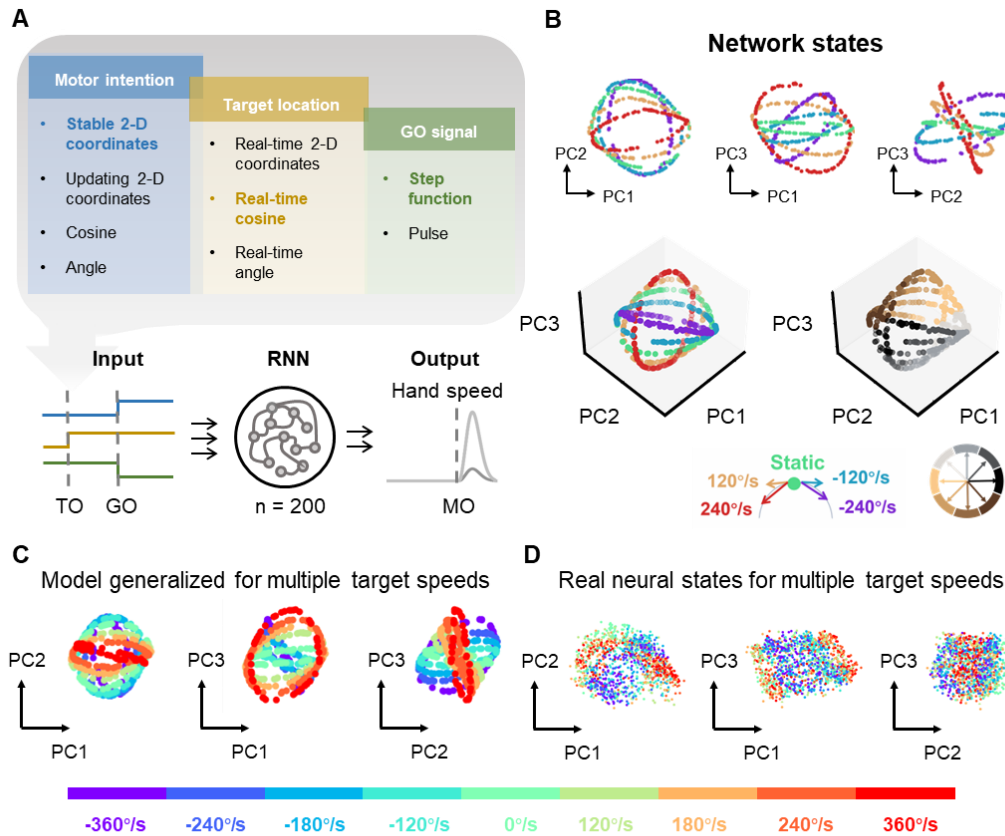

331

### 332 **Figure 5. The neural geometry in RNNs**

333 (A) RNN structure. The input of network contains different forms of motor intention, target  
334 location, and GO signal. The time flow for each input is also displayed. For each  
335 combination of inputs, the RNN with 200 hidden units is expected to output hand velocity  
336 for accurate interception.

337 (B) Network state geometry. The PCA results of RNN node activity result in a similar  
338 orbital geometry with neural data. Each point represents a trial and is colored according  
339 to target speed or reach direction (similar to Figure 4).

340 (C) The generalization to novel target speed in RNN. Network states are colored in  
341 target-speed conditions (color bar below). The ellipses for novel target speed are  
342 geometrically interpolated according to motion direction and speed magnitude of target.

343 (D) The generalization to novel target speed of real neural states (monkey C).

344

## 345 **Population neural geometry relies on neuronal tuning**

346 While the RNNs showed how special state geometry could dynamically  
347 emerge, another possibility was that the orbital geometry was also rooted in  
348 neuronal mixed sensorimotor selectivity. In this section, we probe whether a  
349 group of single neurons with some type of mixed sensorimotor selectivity can  
350 deliver the orbital neural geometry instantaneously, given motor intention and  
351 target speed.

352 For this purpose, three models for single neurons were deduced from the  
353 three typical modulations described above (PD shift, gain, and baseline, see  
354 [Figure 2](#) and [S1-S3](#)), along with a full model designed to contain them all  
355 ([Methods](#)). We found that the adjusted  $R^2$  of the full model ( $0.62\pm 0.19$ ) was  
356 larger than that of the PD shift model ( $0.2\pm 0.19$ ), gain model ( $0.55\pm 0.19$ ) and  
357 baseline model ( $0.47\pm 0.24$ ) for monkey C ( $n=95$ , rank-sum test,  $p<0.01$ , see  
358 examples in [Figure 6A](#)). The results were similar for the three monkeys  
359 ([Figure S7B](#)), again corroborating the mixture of patterns of sensorimotor  
360 selectivity on single neurons. Then, we ran a simulation with neuronal models.  
361 To clarify the effect of each modulation, we performed PCA on the activity of  
362 three groups of model neurons ([Figure 6B](#)). In the implementation, each group  
363 consisted of 200 model neurons with their PDs uniformly distributed, and was  
364 solely modulated by PD shift, gain, or baseline ([Methods](#)). The resulting  
365 neural geometry in the three simulation groups showed distinct features  
366 ([Figure 6C](#)): The five target-speed ellipses were inclined with condition-  
367 dependent angles in PD shift group and gain group, similar to the real data,  
368 but the ellipses in baseline group were layered in parallel. The reach-direction  
369 clusters in the first two PCs were preserved in the gain and baseline group,  
370 but not in the PD shift group. Therefore, only the gain modulation group could  
371 reproduce the desired orbital neural geometry.

372 The direct link of single-neuron selectivity with the shape of the population  
373 neural geometry, as suggested by our simulations, connects our  
374 understandings of sensorimotor interaction at different levels. From this, the  
375 gain modulation by sensory input on motor output appears to be a core  
376 characteristic, dominating the nonlinear sensorimotor interplay at movement



377

initiation during the dynamical process of interception.

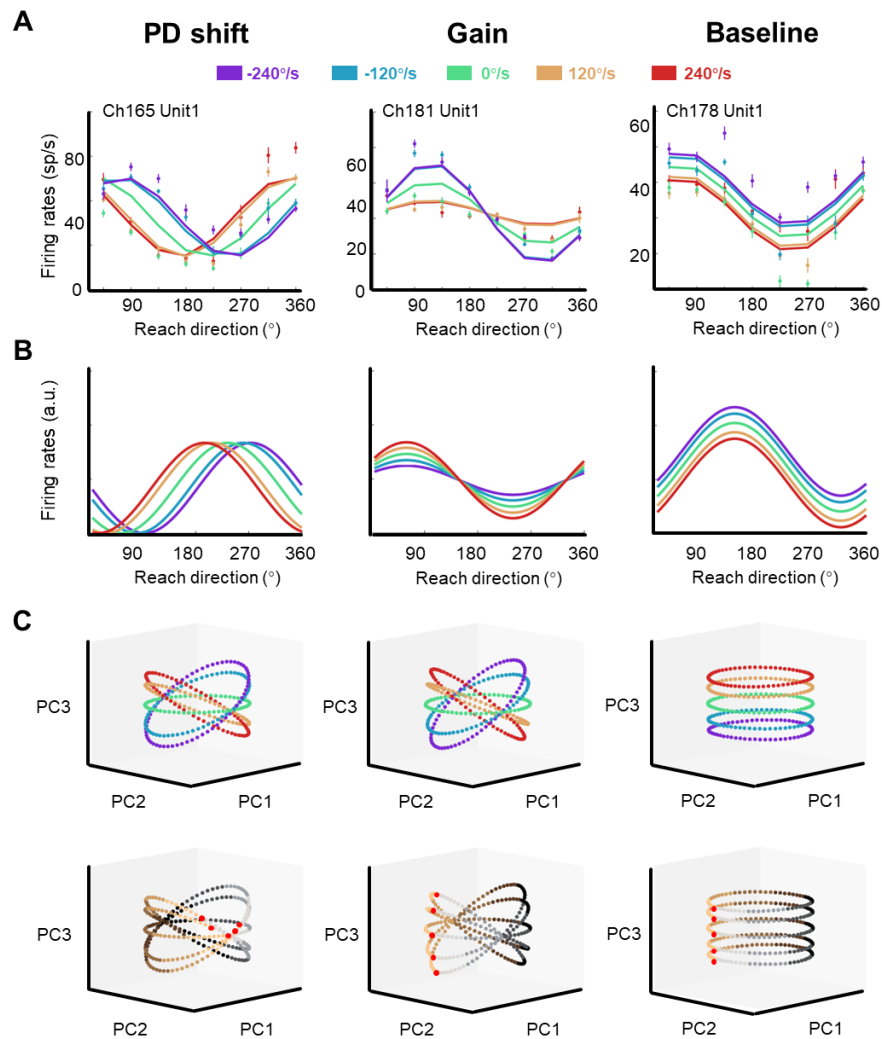

378

379 **Figure 6. The shape of neural dynamics determined by neuronal mixed**  
 380 **selectivity**

381 (A) The activity of three example neurons with PD shift, gain, and baseline modulation  
 382 (the same neurons as in Figure 2B). Dots and bars denote the average and standard  
 383 error of firing rate under corresponding direction, colored in target-speed conditions.

384 Lines show the fitted firing rates for corresponding models.

385 (B) The tuning curves of the three simulated neurons fitted by PD shift, gain, and  
 386 baseline model, respectively.

387 (C) Neural states of population simulated neurons are shown in the space spanned by  
 388 the first three PCs, colored by target speed or reach direction. Each population consists  
 389 of 200 simulated neurons. The neural state in 180° reach direction is highlighted with a  
 390 red marker. The first two PCs can explain more than 95% of the variance in the data.

391 (Explained variance for the first three PCs, in PD shift: 50.1%, 47.1%, 1.6%; in Gain:

392 49.5%, 46.6%, 2.0%; in Baseline: 50.8%, 47.9% & 1.4%)

393

## 394 **Discussion**

395 To reveal how sensory inflows and motor outflows interplay in M1 to issue  
396 motor commands, we recorded population activity from monkeys performing a  
397 flexible manual interception that is highly dependent on predictive  
398 sensorimotor transformations. Single-neuron activity showed that the  
399 movement tuning of M1 neurons varied with target speeds in complicated  
400 ways, including PD shift, gain modulation, baseline adjustment, or their  
401 mixture. Dimensionality reduction on population activity revealed an orbital  
402 neural geometry with reach-direction clusters and tilted target-speed ellipses.  
403 Such a geometry, which also emerged in the RNN trained for appropriate  
404 input-output mappings, could be generalized to new target speeds. These  
405 results suggest that the neural mechanisms for predictive spatiotemporal  
406 transformation, especially during the interception in a dynamical context, stem  
407 from neuronal mixed sensorimotor selectivity, and can be visualized as a low-  
408 dimensional neural geometry compactly representing the sensorimotor  
409 interaction.

### 410 **Dynamic sensorimotor interplay in the frontoparietal circuitry**

411 Our investigation of the neuronal mixed selectivity was largely based on the  
412 efficient and systematic separation between sensory modulation and motor  
413 generation afforded by the behavioral paradigm (Li et al., 2018). The resulting  
414 movement endpoints distributed over the entire circle in our task enabled  
415 further scrutiny of the interaction between sensory and motor information,  
416 compared to that limited to a fixed touch point (Merchant et al., 2003). In  
417 addition, the regular target motion in our task resulted in similar behavioral  
418 characteristics, as opposed to the winding hand trajectories in the random  
419 pursuit task (Tkach et al., 2007). Therefore, unlike the interaction between  
420 motor efferent variables such as reach direction and hand velocity (Inoue et  
421 al., 2018; Moran and Schwartz, 1999; Paninski et al., 2004), or between  
422 sensory afferent parameters like gaze and head direction (Zipser and  
423 Andersen, 1988), our paradigm highlights an input-output interaction in the  
424 mapping from time-varying sensory input to definite motor output.

425 We speculate that this sensorimotor tuning reflects the ongoing flow of  
426 information in the frontoparietal network. The frontal and parietal areas are  
427 strongly interconnected and orchestrate many aspects of action planning  
428 (Andersen and Cui, 2009; Battaglia-Mayer and Caminiti, 2019). It is widely  
429 believed that the PPC plays a crucial role in the transformation from sensation  
430 to motor intention (Andersen and Buneo, 2002). In particular, area 7a has  
431 been reported to convey sensory information after the appearance of stimuli  
432 (Merchant et al., 2004a), while explicitly conveying intention about the  
433 forthcoming movement before interception (Li et al., 2022). In contrast, in this  
434 study, M1 encodes the reach direction in a sensory-modulated manner for  
435 almost entire trial (Figure 3). Taken together, these observations suggest that  
436 the sensorimotor integration occurs in circuits between the PPC and M1, as a  
437 part of the frontoparietal layered processing from intention to execution.

### 438 **Sensorimotor computation in neural dynamics**

439 In the orbital neural geometry, the sensory modulation seems to be presented  
440 in the third PC, whereas the motor information is captured by the first two PCs  
441 (Figure 4 and S5). This orthogonality of target speed relative to reach  
442 direction is consistent with the output-null hypothesis (Kaufman et al., 2014),  
443 which has also been supported by a study explaining how perturbation-  
444 evoked response avoided affecting the ongoing movement (Stavisky et al.,  
445 2017). Interestingly, it appears to be better explained in spherical coordinates  
446 than Cartesian coordinates, which is different from the previously described  
447 sensorimotor geometry (Remington et al., 2018).

448 Moreover, the maintenance of this neural geometry for more than 200 ms  
449 (Figure 3C, neural states around GO and MO) can be attributed to evolution  
450 from different initial states. The initial states are set by the preparatory activity  
451 in the motor cortex, which is promoted towards a movement-specific optimal  
452 subspace (Churchland et al., 2010; Churchland et al., 2006). As the motor  
453 cortex can be treated as an autonomous dynamical system (Churchland et al.,  
454 2012; Vyas et al., 2020), its evolution is hence influenced by initial states. In  
455 this case, the distribution of the initial states is hinted at by the orbital neural  
456 geometry, correspondingly featured by the reach-direction clusters and the  
457 tilted target-speed ellipses.

## 458 **Neural geometry and neuronal mixed selectivity**

459 As mentioned above, we found both mixed sensorimotor selectivity and the  
460 population orbital geometry in predictive sensorimotor control, raising the  
461 question of their relationship. A recent study has discussed this issue, and it  
462 proposed that the collective dynamics are flexibly shaped by the constitution  
463 of neural subpopulations with different selectivity and mainly driven by the  
464 complexity of the input-output mapping requirement of the performed task  
465 (Dubreuil et al., 2022). This provides an explanation for the differences among  
466 the neural geometries of three monkeys: The larger eccentricity ([Figure S6A](#))  
467 and the more compressed structure ([Figure S6B](#)) of the five target-speed  
468 ellipses might both be related to the relatively lower proportion of the recorded  
469 neurons with mixed selectivity (44% and 52% vs. 66%, see [Figure 2C](#)).  
470 Furthermore, as the simulation result directly shows ([Figure 6](#)), a  
471 subpopulation with certain mixed selectivity can give corresponding features  
472 to their low-dimensional neural geometry, which implies that the dominant  
473 neuronal properties in the population can be estimated in turn.

474 Such neural geometry, however, may not be determined via pre-set  
475 computational procedures or by biological hierarchy, but may gradually  
476 emerge from the interplay between specific inputs and outputs (Pouget and  
477 Snyder, 2000). This can be evidenced by the reproduction of the orbital neural  
478 geometry in RNNs ([Figure 5B](#)). Thus, the motor plan for interception is likely  
479 to be generated from an interactive rather than hierarchical sensorimotor  
480 transformation.

## 481 **Conclusions**

482 A nonlinear sensorimotor interplay persistently occurs in the motor cortex  
483 during predictive sensorimotor control in dynamic circumstances, in this study  
484 in the form of an orbital neural geometry in population dynamics. Significant  
485 for the accomplishment of actions, such interaction comes from neuronal  
486 mixed selectivity and task-dependent input-output mapping. The present  
487 study adds to growing knowledge of dynamic sensorimotor processing; yet  
488 understanding more details may await the simultaneous recording of multiple  
489 cortical and subcortical regions and experimental interventions.

## 490 **Acknowledgement**

491 We thank C. Li, J. Mapleli, C. Zheng, and R. Zheng for helpful comments and  
492 discussions; C. Guan for veterinary assistance; and P. Ding, L. Du, and Z.  
493 Xiao for administrative support. This work was supported by National Key  
494 R&D Program (Grants 2020YFB1313400 and 2017YFA0701102), National  
495 Science Foundation of China (Grants 31871047 and 31671075), Shanghai  
496 Municipal Science and Technology Major Project (Grant 2021SHZDZX) and  
497 CAS Strategic Priority Research Program (Grant XDB32040103).

## 498 **Author Contributions**

499 Y. Zhang and H. Cui designed the experiment, Y. Zhang and T. Wang  
500 collected the data, Y. Zhang and Y. Chen analyzed the data, Y. Chen built  
501 RNNs, Y. Zhang performed the simulation, Y. Zhang, Y. Chen, T Wang, and  
502 H. Cui prepared the manuscript.

## 503 **Declaration of interests**

504 The authors declare no competing interests.

## 505 **STAR Methods**

### 506 **RESOURCE AVAILABILITY**

#### 507 **Lead Contact**

508 Further information and requests for the data and codes should be directed to  
509 and will be fulfilled by the Lead Contact, He Cui ([cuihe@ion.ac.cn](mailto:cuihe@ion.ac.cn)).

#### 510 **Materials availability**

511 This study did not generate new unique reagents.

#### 512 **Data and code availability**

513 The datasets and code supporting the current study have not been deposited in a  
514 public repository but are available from the corresponding author on request.

515

### 516 **EXPERIMENTAL MODEL AND SUBJECT DETAILS**

#### 517 **Animals**

518 Three adult male rhesus macaques (monkey C, D, and G, *Macaca mulatta*, 7-  
519 10 kg) were used in this study. The monkeys sat in a primate chair to perform  
520 the task. The stimuli were back projected onto a vertical touch screen (Elo  
521 Touch system, 19"; sampling at 100 Hz, spatial resolution <0.1 mm) about 30  
522 cm in front of the monkeys. The hand trajectory was tracked by an optic  
523 camera (VICON Inc.) with an infrared marker on the fingertip. All the  
524 maintenance and procedures were in accordance with NIH guidelines and  
525 were approved by the CEBSIT Institutional Animal Care and Use Committee  
526 (IACUC).

527

### 528 **METHOD DETAILS**

#### 529 **Task and behavior**

530 The monkeys were trained to perform a flexible manual interception task in a  
531 dark room. The task paradigm was modified based on the visually guided  
532 reaching interception task in a previous study (Li et al., 2018). At the  
533 beginning, the monkey held the green center dot of a touch screen for 600 ms

534 to initiate a trial ([Figure 1A](#)). Then, a green target dot appeared in a random  
535 location on the surrounding circle (invisible to the monkey) and started to  
536 rotate around the center. The center dot turned dark as a GO cue after a  
537 random delay ( $600\pm 200$  ms), then the monkey could intercept the target at  
538 any moment within 150-800 ms after GO cue. Once any peripheral location  
539 was touched, the target stopped. The tolerance range of the touch endpoint  
540 for correct trials is less than 2.5 cm away from the target. The monkey would  
541 be rewarded with juice after each correct trial. The target speed of clockwise -  
542 240 °/s, -120 °/s and counterclockwise 120 °/s, 240 °/s, as well as static, was  
543 pseudo-randomly interleaved trial by trial. More kinds of target speeds (-  
544 360 °/s, -180 °/s, 180 °/s, 360 °/s added) were introduced in the additional  
545 sessions.

#### 546 **Data collection**

547 After the monkeys were adequately trained for the interception task  
548 (successful rate > 90%). Head-posts were implanted stereotaxically under  
549 anesthesia (introduced by 10 mg/kg ketamine, then sustained by 2%  
550 Isoflurane). After few weeks of recovery and adaptation, the monkeys were  
551 implanted with Utah microelectrode arrays (Blackrock Microsystems, Salt  
552 Lake City, UT) in the motor cortex of the hemisphere contralateral to the  
553 handedness ([Figure 2A](#), 128-channel array for monkey C, 96-channel array  
554 for monkey G and D). The location of recording area referred to Magnetic  
555 Resonance Imaging (MRI) and cortical sulcus features. The neuronal activity  
556 was recorded by Blackrock Microsystem 256-channel recording system,  
557 sampled at 30 kHz. In the selected sessions, we collected 95, 107, and 55  
558 well-isolate units of monkey C, G, and D, respectively.

## 559 **QUANTIFICATION AND STATISTICAL ANALYSIS**

### 560 **Peri-stimulus time histograms (PSTHs)**

561 The spike rasters and PSTHs of single neurons are shown in [Figures 2B](#) and  
562 [S1-S3](#). All firing rates were calculated with 50-ms bin and smoothed with a  
563 Gaussian kernel (standard deviation = 20 ms). The standard error of firing  
564 rates was estimated from the 10 bootstrap samples in the trials of  
565 corresponding condition.

## 566 **Classification of neuronal tuning properties**

567 The preferred direction (PD) of each neuron for different target-speed  
568 conditions, in 100-ms bins, was calculated by the weighted sum of neuronal  
569 firing rates averaged in eight reach-direction conditions. The tuning depth of  
570 each neuron was determined by the range (max - min) of firing rates in  
571 corresponding condition. The baseline activity of each neuron was determined  
572 by the averaged neuronal firing rate in selected condition.

573 Based on the PD, tuning depth and baseline activity of single neurons, a  
574 neuron was classified as 'PD shift', if its PDs were significantly different  
575 between interception and static condition (Watson-Williams test in circular  
576 data, CircStat by (Berens, 2009)); a neuron was classified as 'gain' if its tuning  
577 depths were significantly different between interception and static condition  
578 (two-tailed Wilcoxon signed rand test,  $p < 0.05$ ); a neuron was classified as  
579 'baseline' if its baseline activities were significantly different between  
580 interception and static condition (two-tailed Wilcoxon signed rand test,  
581  $p < 0.05$ ).

## 582 **Population decoding**

583 The population activity of the motor cortex was used to decode target speed  
584 and reach direction by support vector machine (SVM). Neuronal firing rate  
585 was soft-normalized as

$$586 \quad Fr_{norm.} = \frac{Fr_{raw}}{Fr_{max} - Fr_{min} + 5}$$

587 where raw firing rates was divided by the range of firing rates plus five  
588 (Churchland et al., 2012). We respectively trained two SVM classifiers  
589 (MATLAB function 'fitcecoc', 10-fold cross-validation) to decode reach  
590 direction (one in eight) and target speed (one in five) of single trials in 100-ms  
591 sliding window with 50-ms stride step. The temporal decoding procedure was  
592 repeated ten times to obtain the mean and standard deviation of decoding  
593 accuracy (Figure 3A). Then, we tested the generalization of groups of reach-  
594 direction and target-speed decoders (SVM, MATLAB function 'fitcecoc', 10-  
595 fold cross-validation) in different conditions. For this purpose, three epochs  
596 were selected as 200~400 ms after TO (TO + [200~400] ms), 200 ms around  
597 GO (GO  $\pm$  100 ms), and 200 ms around MO (MO  $\pm$  100 ms), and single-trial  
598 normalized population activity was averaged according to both conditions and



599 epochs. The reach-direction decoder, which was trained by a particular target-  
600 speed condition in each epoch, was tested with trials from other target-speed  
601 condition trials in different epochs. Similarly, the target-speed decoder, which  
602 was trained by a given reach direction condition in each epoch, was tested  
603 with trials from other reach-direction condition trials in different epochs. The  
604 decoding accuracy for generalization is shown in confusion matrices (Figure  
605 3B).

### 606 **Neural state**

607 The population activity was stored in NKT datasets, where N was the number  
608 of neurons, K was the number of trials, and T was the number of time bins.  
609 Neural activity was normalized by Z-score (MATLAB function 'zscore'). To  
610 obtain the neural states at a given time point, neural activity was averaged for  
611 relevant time bins (e.g. the two 50-ms bins around MO) to result in a K\*N  
612 dataset. After preprocessing, we used PCA to reduce the dimension from K\*N  
613 to K\*C (C was the number of principal components). In the space spanned by  
614 the first three PCs, neural states of single trials were colored in target speed  
615 or reach direction (Figure 3C). All ellipse fitting was performed in three-  
616 dimensional space. To show the condition-dependent neural structure more  
617 clearly, we also projected neural states into the space of static condition  
618 (Figure 4).

### 619 **RNN training**

620 In this procedure, motor intention appeared after GO and was represented as  
621 fixed variables in forms of two-dimensional coordinates, cosine of reach  
622 direction, or reach direction itself. We also tried an alternative form as  
623 updating two-dimensional coordinates, which changed with time. Target  
624 location was designed as real-time two-dimensional coordinates as well as  
625 cosine or angle of real-time target direction, while the Go-signal was a step  
626 function from 1 to 0 or a 10-ms pulse. The RNN in Figure 5 received motor  
627 intention as stable two-dimensional coordinates, target location as real-time  
628 cosine, and GO-signal as a step function. All trained RNNs were of 200  
629 hidden units and to output hand velocity for accurate interception.

630 We built the three-layer RNNs with nodes according to standard dynamic  
631 differential equation:

$$632 \quad \tau \dot{x} = -x + Jr + Bu$$

633 where  $x$  means the activity,  $r$  means the firing rates,  $\tau$  means time  
634 constant (50 ms). The connection matrix  $J$  of hidden layer is initiated as  
635 random in a normal distribution and the matrix  $B$  denotes the connection  
636 between inputs and hidden units. The output  $z$  is obtained by

$$637 \quad z = Wr$$

638 where  $W$  is the read-out weight and is expected to reproduce the desired  
639 hand velocity generated by bell-shaped physical equation (Kao et al., 2021).  
640 During training, the loss function was:

$$641 \quad E = e + \alpha r_1 + \beta r_2$$

642 where  $e$  means the mean squared error of  $z$  and training target.  $r_1$  and  $r_2$   
643 are regularities (Sussillo et al., 2015),  $r_1$  denotes the magnitude of input and  
644 readout weight and is calculated as their squared sum, while  $r_2$  denotes the  
645 magnitude of the nodes' activity and is calculated as activity squared sum  
646 through time. For constants,  $\alpha = 1e - 3$  and  $\beta = 1e - 7$ .

#### 647 **Single-neuron fitting and simulation**

648 We used PD shift, gain, baseline, and full models to fit neuronal activity,  
649 based on cosine tuning. The gain model introduces nonlinear target-speed  
650 effects on the amplitude of cosine tuning as:

$$651 \quad FR = \left( \frac{a_1}{1 + e^{-a_2(sp)}} + c_2 \right) * \cos(\theta - \theta_{pd}) + c_1$$

652 where  $FR$  is the firing rate at movement onset ( $MO \pm 100$  ms).  $\theta$  and  $sp$ . Is  
653 the reach direction and target speed, respectively.  $\theta_{pd}$  is the fitted preferred  
654 direction of the neuron.  $a_1, a_2, c_1$  are constants to be fitted. Neurons are fitted  
655 by single-trial data.

656 In the PD shift model, the target-speed effects on PDs as:

$$657 \quad FR = a_1 * \cos\left(\theta - \theta_{pd} + \frac{a_3}{1 + e^{-a_2(sp)}}\right) + c_1$$

658 with the similar symbols to gain model and a new constant  $a_3$ .

659 In the baseline model, the target speed adjusts the baseline activity:

$$660 \quad FR = a_1 * \cos(\theta - \theta_{pd}) + \frac{a_3}{1 + e^{-a_2(sp)}} + c_1$$

661 with similar symbols to above models.

662 The full model integrates all the three above effects:

$$\begin{aligned} 663 \quad FR &= a_1 * \cos(\theta - pd_{sp}) + \frac{a_2}{1 + e^{-a_2(sp)}} + \frac{a_3}{1 + e^{-a_2(sp)}} * \cos(\theta - pd_{sp}) + a_4 \\ 664 \quad &* \cos\left(\theta - pd_{sp} - \frac{a_5}{1 + e^{-a_2(sp)}}\right) + c_1 \end{aligned}$$

665 with constants  $a_1, a_2, a_3, a_4, a_5$ .

666 We fitted neuronal activity with these four models (MATLAB 'fit' function)

667 and compared the fitting goodness with adjusted R-squares ( $R_{adj}^2 =$

668  $\frac{(1-r^2)(n-1)}{n-p-1}$ , where  $n$  is the trial number, and  $p$  is the degree of the

669 polynomial).

670 Simulation with model neurons were based on these models to investigate

671 the relationship between neuronal tuning and population neural geometry.

672

673

## 674 **References**

- 675 Andersen, R.A., and Buneo, C.A. (2002). Intentional maps in posterior parietal  
676 cortex. *Annu Rev Neurosci* 25, 189-220.  
677 [10.1146/annurev.neuro.25.112701.142922](https://doi.org/10.1146/annurev.neuro.25.112701.142922).
- 678 Andersen, R.A., and Cui, H. (2009). Intention, action planning, and decision  
679 making in parietal-frontal circuits. *Neuron* 63, 568-583.  
680 [10.1016/j.neuron.2009.08.028](https://doi.org/10.1016/j.neuron.2009.08.028).
- 681 Battaglia-Mayer, A., and Caminiti, R. (2019). Corticocortical Systems  
682 Underlying High-Order Motor Control. *J Neurosci* 39, 4404-4421.  
683 [10.1523/jneurosci.2094-18.2019](https://doi.org/10.1523/jneurosci.2094-18.2019).
- 684 Berens, P.J.J.o.S.S. (2009). CircStat: AMATLABToolbox for Circular  
685 Statistics. 31.
- 686 Churchland, M.M., Cunningham, J.P., Kaufman, M.T., Foster, J.D.,  
687 Nuyujukian, P., Ryu, S.I., and Shenoy, K.V. (2012). Neural population  
688 dynamics during reaching. *Nature* 487, 51-56. [10.1038/nature11129](https://doi.org/10.1038/nature11129).
- 689 Churchland, M.M., Cunningham, J.P., Kaufman, M.T., Ryu, S.I., and Shenoy,  
690 K.V. (2010). Cortical preparatory activity: representation of movement or first  
691 cog in a dynamical machine? *Neuron* 68, 387-400.  
692 [10.1016/j.neuron.2010.09.015](https://doi.org/10.1016/j.neuron.2010.09.015).
- 693 Churchland, M.M., Yu, B.M., Ryu, S.I., Santhanam, G., and Shenoy, K.V.  
694 (2006). Neural variability in premotor cortex provides a signature of motor  
695 preparation. *J Neurosci* 26, 3697-3712. [10.1523/JNEUROSCI.3762-05.2006](https://doi.org/10.1523/JNEUROSCI.3762-05.2006).
- 696 Cisek, P., and Kalaska, J.F. (2005). Neural correlates of reaching decisions in  
697 dorsal premotor cortex: specification of multiple direction choices and final  
698 selection of action. *Neuron* 45, 801-814. [10.1016/j.neuron.2005.01.027](https://doi.org/10.1016/j.neuron.2005.01.027).
- 699 Cui, H. (2016). Forward Prediction in the Posterior Parietal Cortex and  
700 Dynamic Brain-Machine Interface. *Frontiers in integrative neuroscience* 10,  
701 35. [10.3389/fnint.2016.00035](https://doi.org/10.3389/fnint.2016.00035).

- 702 Dubreuil, A., Valente, A., Beiran, M., Mastrogiuseppe, F., and Ostojic, S.  
703 (2022). The role of population structure in computations through neural  
704 dynamics. *Nat Neurosci* 25, 783-794. 10.1038/s41593-022-01088-4.
- 705 Evarts, E.V. (1968). Relation of pyramidal tract activity to force exerted during  
706 voluntary movement. *J Neurophysiol* 31, 14-27. 10.1152/jn.1968.31.1.14.
- 707 Georgopoulos, A.P., Kalaska, J.F., Caminiti, R., and Massey, J.T. (1982). On  
708 the relations between the direction of two-dimensional arm movements and  
709 cell discharge in primate motor cortex. *J Neurosci* 2, 1527-1537.
- 710 Hatsopoulos, N.G., and Suminski, A.J. (2011). Sensing with the motor cortex.  
711 *Neuron* 72, 477-487. 10.1016/j.neuron.2011.10.020.
- 712 Inoue, Y., Mao, H., Suway, S.B., Orellana, J., and Schwartz, A.B. (2018).  
713 Decoding arm speed during reaching. *Nature communications* 9, 5243.  
714 10.1038/s41467-018-07647-3.
- 715 Kao, T.C., Sadabadi, M.S., and Hennequin, G. (2021). Optimal anticipatory  
716 control as a theory of motor preparation: A thalamo-cortical circuit model.  
717 *Neuron* 109, 1567-1581.e1512. 10.1016/j.neuron.2021.03.009.
- 718 Kaufman, M.T., Churchland, M.M., Ryu, S.I., and Shenoy, K.V. (2014).  
719 Cortical activity in the null space: permitting preparation without movement.  
720 *Nature neuroscience* 17, 440-448. 10.1038/nn.3643.
- 721 Li, Y., Wang, Y., and Cui, H. (2018). Eye-hand coordination during flexible  
722 manual interception of an abruptly appearing, moving target. *J Neurophysiol*  
723 119, 221-234. 10.1152/jn.00476.2017.
- 724 Li, Y., Wang, Y., and Cui, H. (2022). Posterior parietal cortex predicts  
725 upcoming movement in dynamic sensorimotor control. *Proceedings of the*  
726 *National Academy of Sciences of the United States of America* 119,  
727 e2118903119. 10.1073/pnas.2118903119.
- 728 Merchant, H., Battaglia-Mayer, A., and Georgopoulos, A.P. (2003).  
729 Interception of real and apparent motion targets: psychophysics in humans  
730 and monkeys. *Experimental brain research* 152, 106-112. 10.1007/s00221-  
731 003-1514-5.

- 732 Merchant, H., Battaglia-Mayer, A., and Georgopoulos, A.P. (2004a). Neural  
733 responses during interception of real and apparent circularly moving stimuli in  
734 motor cortex and area 7a. *Cerebral cortex* (New York, N.Y. : 1991) *14*, 314-  
735 331. 10.1093/cercor/bhg130.
- 736 Merchant, H., Battaglia-Mayer, A., and Georgopoulos, A.P. (2004b). Neural  
737 responses in motor cortex and area 7a to real and apparent motion.  
738 *Experimental brain research* *154*, 291-307. 10.1007/s00221-003-1664-5.
- 739 Moran, D.W., and Schwartz, A.B. (1999). Motor cortical representation of  
740 speed and direction during reaching. *J Neurophysiol* *82*, 2676-2692.  
741 10.1152/jn.1999.82.5.2676.
- 742 Omrani, M., Kaufman, M.T., Hatsopoulos, N.G., and Cheney, P.D. (2017).  
743 Perspectives on classical controversies about the motor cortex. *J*  
744 *Neurophysiol* *118*, 1828-1848. 10.1152/jn.00795.2016.
- 745 Paninski, L., Fellows, M.R., Hatsopoulos, N.G., and Donoghue, J.P. (2004).  
746 Spatiotemporal tuning of motor cortical neurons for hand position and velocity.  
747 *J Neurophysiol* *91*, 515-532. 10.1152/jn.00587.2002.
- 748 Pesaran, B., Nelson, M.J., and Andersen, R.A. (2006). Dorsal premotor  
749 neurons encode the relative position of the hand, eye, and goal during reach  
750 planning. *Neuron* *51*, 125-134. 10.1016/j.neuron.2006.05.025.
- 751 Pouget, A., and Snyder, L.H. (2000). Computational approaches to  
752 sensorimotor transformations. *Nature neuroscience* *3 Suppl*, 1192-1198.  
753 10.1038/81469.
- 754 Remington, E.D., Narain, D., Hosseini, E.A., and Jazayeri, M. (2018). Flexible  
755 Sensorimotor Computations through Rapid Reconfiguration of Cortical  
756 Dynamics. *Neuron* *98*, 1005-1019 e1005. 10.1016/j.neuron.2018.05.020.
- 757 Shenoy, K.V., Sahani, M., and Churchland, M.M. (2013). Cortical control of  
758 arm movements: a dynamical systems perspective. *Annu Rev Neurosci* *36*,  
759 337-359. 10.1146/annurev-neuro-062111-150509.
- 760 Sobinov, A.R., and Bensmaia, S.J. (2021). The neural mechanisms of manual  
761 dexterity. *Nature reviews. Neuroscience* *22*, 741-757. 10.1038/s41583-021-  
762 00528-7.

- 763 Stavisky, S.D., Kao, J.C., Ryu, S.I., and Shenoy, K.V. (2017). Trial-by-Trial  
764 Motor Cortical Correlates of a Rapidly Adapting Visuomotor Internal Model. *J*  
765 *Neurosci* 37, 1721-1732. 10.1523/jneurosci.1091-16.2016.
- 766 Sussillo, D., Churchland, M.M., Kaufman, M.T., and Shenoy, K.V. (2015). A  
767 neural network that finds a naturalistic solution for the production of muscle  
768 activity. *Nature neuroscience* 18, 1025-1033. 10.1038/nn.4042.
- 769 Tanaka, H. (2016). Modeling the motor cortex: Optimality, recurrent neural  
770 networks, and spatial dynamics. *Neuroscience research* 104, 64-71.  
771 10.1016/j.neures.2015.10.012.
- 772 Tkach, D., Reimer, J., and Hatsopoulos, N.G. (2007). Congruent activity  
773 during action and action observation in motor cortex. *J Neurosci* 27, 13241-  
774 13250. 10.1523/jneurosci.2895-07.2007.
- 775 Vyas, S., Golub, M.D., Sussillo, D., and Shenoy, K.V. (2020). Computation  
776 Through Neural Population Dynamics. *Annu Rev Neurosci* 43, 249-275.  
777 10.1146/annurev-neuro-092619-094115.
- 778 Wang, T., Chen, Y., and Cui, H. (2022). From parametric representation to  
779 dynamical system: shifting views of the motor cortex in motor control.  
780 *Neuroscience Bulletin* 38, 796-808. 10.1007/s12264-022-00832-x.
- 781 Zipser, D., and Andersen, R.A. (1988). A back-propagation programmed  
782 network that simulates response properties of a subset of posterior parietal  
783 neurons. *Nature* 331, 679-684. 10.1038/331679a0.
- 784
